# Supplementary material
Source: Research Square preprint supplement (doi:10.21203/rs.3.rs-9731101/v1)
Supplement: Supplementary file 1 [file bf87d398aa5d163c66160ec5.docx]

**Table 1 Primer sequences designed in this study**

| **Primer name Sequence (5’-3’) Product size (bp)** | | |
| --- | --- | --- |
| BVDV-F | ATGGCTGAAGCCCTGAGTACA | 223 |
| BVDV-R | CATGTGCCATGTACAGCAGAGA |
| BEV-F | TTTAAAACAGCCTGGGGGTTGTAC | 638 |
| BEV-R | CGGAGTACCGAAAGTAGTCTGTTC |
| BVDV-SYBR-F | ATGGCTGAAGCCCTGAGTACA | 220 |
| BVDV-SYBR-R | GTGCCATGTACAGCAGAGA |
| BEV-SYBR-F | TTGTACGCCTGTTTTCCCCTCCCTT | 90 |
| BEV-SYBR-R | ACCAGTGTACTGGTGCGGCATTGCC |
| BEV-F1 | AAACAGCCTGGGGGTTGTAC | 1548 |
| BEV-R1 | ATCCATTGGTGTGGGTA |
| BEV-F2 | TACCATCTGTGCAGTGGACC | 3190 |
| BEV-R2 | TTGGTCTTGAACTGCATTGC |
| BEV-F3 | GCAATGCAGTTCAAGACCAA | 804 |
| BEV-R3 | GATCTTTTCCTGAACGATCC |
| BEV-F4 | GGCGATGGAATGAGGTATAGC | 2434 |
| BEV-R4 | GCGGGTGTATTGTGCCAATT |
